# Supplementary material
Source: bioRxiv or medRxiv preprint supplement (https://medrxiv.org/highwire/filestream/85877/field_highwire_adjunct_files/2/2020.06.11.20128686-3.pdf)
Supplement: Supplementary file [file 2020.06.11.20128686-3.pdf]

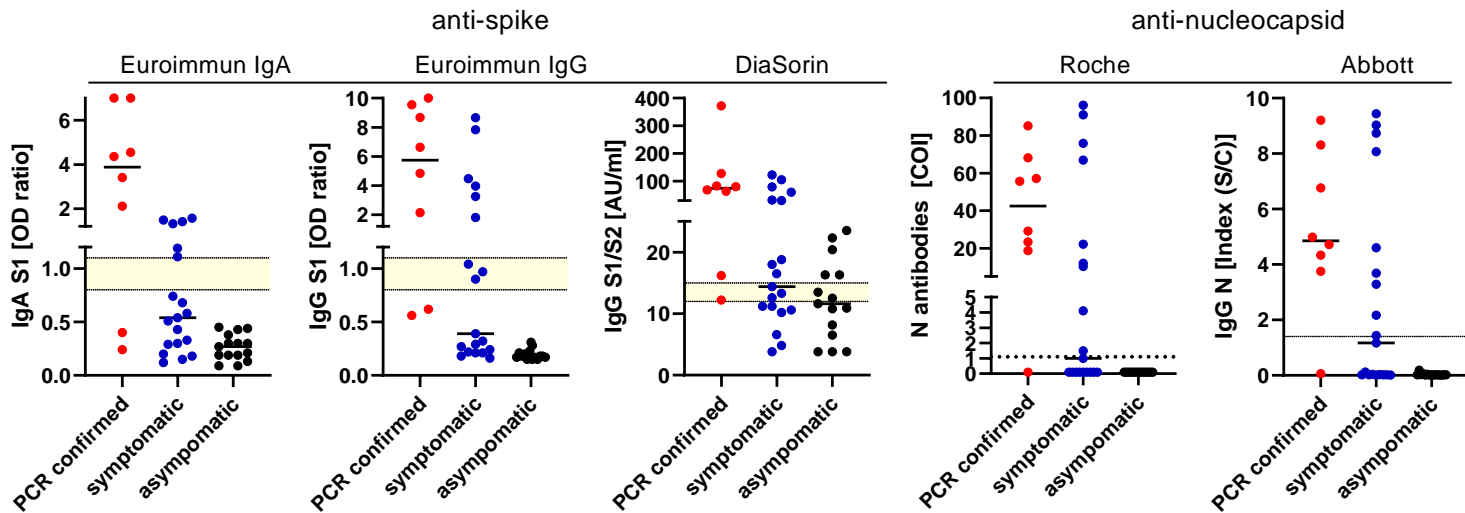

**Figure S1:** Detection of SARS-CoV-2 specific antibodies with commercial high-throughput Anti-SARS-CoV-2 assay systems, Heinsberg District, Germany, April 2020 (n=42)

AU: arbitrary units; COI: cut-off index; N: nucleocapsid; OD: optical density; S: spike; S/C sample/control

Eight individuals with PCR-confirmed SARS-CoV-2 infection (red), 19 symptomatic (blue) and 15 asymptomatic individuals (black). IgA and IgG S1 Anti-spike antibodies detected by ELISA from EUROIMMUN and IgG S1/S2 CLIA DiaSorin as well as the two tested nucleocapsid-directed antibody tests from Roche and Abbott. Borderline areas of the EUROIMMUN ELISA and the DiaSorin CLIA are indicated in yellow. Dotted lines represent the cut-off value for each assay.
